# Supplementary material
Source: publisher figshare collection journal article supplement (https://gsajournals.figshare.com/ndownloader/files/23187047)
Supplement: Supplementary file 1 [file 23187047]

|  | **Sample Preservation** | **Library Prep Kit** | **Illumina Platform** | **Read Length** |
| --- | --- | --- | --- | --- |
| *Bembidion* sp. nr. *transversale* DNA3229 | Fresh | TruSeq RNA | HiSeq 2000 | 50 |
| *Bembidion* *lividulum* DNA4279 | RNAlater@ -20C | NEBNext RNA Ultra II | HiSeq 2500 | 101 |
| *Chlaenius* *sericeus* JMPR007 | RNAlater @ -20C | NEBNext RNA Ultra II | HiSeq 2500 | 101 |
| *Lionepha* *casta* DNA4602 | RNAlater @ -20C | NEBNext RNA Ultra II | HiSeq 2500 | 100 |
| *Pterostichus* *melanarius* DNA4765 | Fresh | NEBNext RNA Ultra II | HiSeq 2500 | 100 |
| *Trachypachus* *gibbsii* DNA4436 | RNAlater @ -20C | NEBNext RNA Ultra II | HiSeq 2500 | 101 |

Table S4. Additional details for methods used on transcriptomic sequencing specimens. All extractions were performed using a homogenate of the entire body.
